# Supplementary material for: Synergistic photocatalytic aerobic oxidation of sulfides and amines on TiO2 under visible-light irradiation
Source: Royal Society of Chemistry journal article supplement (doi:10.1039/c4sc02891k), 2014-10-30
Supplement: c4sc02891k1.pdf [file c4sc02891k1.pdf]

## Supporting Information:

### **Synergistic Photocatalytic Aerobic Oxidation of Sulfides and Amines on TiO<sub>2</sub> under Visible Light Irradiation**

Xianjun Lang<sup>1</sup>, Wan Ru Leow<sup>1</sup>, Jincai Zhao,<sup>2\*</sup> and Xiaodong Chen<sup>1\*</sup>

1. School of Materials Science and Engineering, Nanyang Technological University, 50 Nanyang Avenue, Singapore 639798, Singapore \*E-mail: [chenxd@ntu.edu.sg](mailto:chenxd@ntu.edu.sg)

2. Key Laboratory of Photochemistry, Beijing National Laboratory for Molecular Sciences, Institute of Chemistry, Chinese Academy of Sciences, Beijing 100190, China

\*E-mail: [jczhao@iccas.ac.cn](mailto:jczhao@iccas.ac.cn)

**General:**

The UV-visible absorption spectra of benzylamine, thioanisole and the mixture of benzylamine and thioanisole were recorded on a Shimadzu UV 2550 UV-vis Spectrophotometer. The detailed recording concentration:  $2 \times 10^{-3}$  M of benzylamine in MeOH;  $2 \times 10^{-4}$  M of thioanisole in CH<sub>3</sub>OH; a mixture of  $6.7 \times 10^{-4}$  M of benzylamine and  $2 \times 10^{-4}$  M of thioanisole in CH<sub>3</sub>OH.

The UV-visible absorption spectra of the solid samples were recorded on the same machine with a diffuse reflectance measurement accessory.

The phase composition of the Degussa P25 TiO<sub>2</sub> sample was identified by X-ray diffraction (XRD) using a Shimadzu 6000 X-ray diffractometer with Cu K<sub>α</sub> radiation ( $\lambda = 1.54178 \text{ \AA}$ ).

The TEM image of Degussa P25 TiO<sub>2</sub> sample was recorded on a JEOL JEM-2010 transmission electron microscope (TEM) operating at 200 kV to obtain the detailed nanostructures.

X-ray Photoelectron Spectroscopy (XPS) were measured by a ESCALAB250XI. The incident radiation was Mg K<sub>α</sub> X-ray (1253.6 eV) at 400 W and a charge neutralizer was turned on for acquisition. The binding energy of N1s was corrected by C 1s peak (284.8 eV) from residual carbon.

**Table S1:** Control experiments for the photocatalytic oxidation of thioanisole on TiO<sub>2</sub> in organic solvent<sup>[a]</sup>

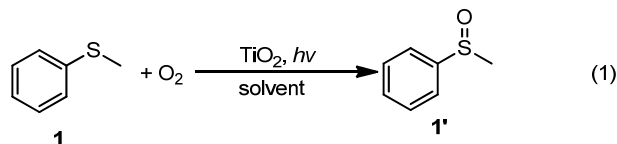

| Entry | Solvent            | Conditions | Conv. (mol%) <sup>[b]</sup> | Select. (mol%) <sup>[b]</sup> |
|-------|--------------------|------------|-----------------------------|-------------------------------|
| 1     | CH <sub>3</sub> CN | >350 nm    | 10                          | 40                            |
| 2     | CH <sub>3</sub> OH | >350 nm    | 5                           | 95                            |
| 3     | CH <sub>3</sub> CN | >400 nm    | 10                          | 63                            |
| 4     | CH <sub>3</sub> OH | >400 nm    | 6                           | 93                            |

Reaction conditions: 0.3 mmol of thioanisole, 0.1 MPa of O<sub>2</sub>, 40 mg of TiO<sub>2</sub> (Degussa P25), 300 W Xe lamp, 5 mL of solvent, 3 h. Longpass cutoff filters are used to control the irradiation wavelength. [b] Determined by GC using chlorobenzene as the internal standard, conversion of thioanisole **1**, selectivity of methyl phenyl sulfoxide **1'**.

**Table S2:** Control experiment for the photocatalytic oxidation of benzylamine on Degussa P25 TiO<sub>2</sub> in organic solvent<sup>[a]</sup>

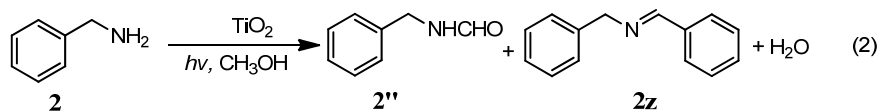

| Entry | Solvent            | Conditions | Conv. (mol%) <sup>[b]</sup> | Select. (mol%) <sup>[b]</sup> |
|-------|--------------------|------------|-----------------------------|-------------------------------|
| 1     | CH <sub>3</sub> CN | >400 nm    | 100                         | 85 (imine)                    |
| 2     | CH <sub>3</sub> OH | >400 nm    | 100                         | 38 (formamide)                |
| 3     | CH <sub>3</sub> OH | >350 nm    | 100                         | 10 (formamide)                |

[a] Reaction conditions: 0.1 mmol of benzylamine, 0.1 MPa of O<sub>2</sub>, 40 mg of Degussa P25 TiO<sub>2</sub>, 5 mL of solvent, 3 h. [b] Determined by GC using chlorobenzene as the internal standard.

**Table S3:** The aerobic oxidation of thioanisole and benzylamine in inert organic solvent on TiO<sub>2</sub> under visible light irradiation<sup>[a]</sup>

| Entry                    | Solvent            | Conv1.<br>(mol%) <sup>[b]</sup> | Select1.<br>(mol%) <sup>[b]</sup> | Conv2.<br>(mol%) <sup>[b]</sup> | Select2.<br>(mol%) <sup>[b]</sup> |
|--------------------------|--------------------|---------------------------------|-----------------------------------|---------------------------------|-----------------------------------|
| <b>1</b>                 | CH <sub>3</sub> CN | 10                              | 63                                | --                              | --                                |
| <b>1'</b> <sup>[c]</sup> | CH <sub>3</sub> CN | 16                              | 86                                | 100                             | 74                                |
| <b>2</b>                 | BTF                | 5                               | 38                                | --                              | --                                |
| <b>2'</b> <sup>[c]</sup> | BTF                | 5                               | 66                                | 100                             | 58                                |
| <b>3</b>                 | EtOAc              | 6                               | 42                                | --                              | --                                |
| <b>3'</b> <sup>[c]</sup> | EtOAc              | 12                              | 80                                | 100                             | 75                                |
| <b>4</b>                 | DCM                | 4                               | 65                                | --                              | --                                |
| <b>4'</b> <sup>[c]</sup> | DCM                | 8                               | 90                                | 100                             | 58                                |

[a] Reaction conditions: 0.3 mmol of thioanisole, 5 mL of solvent, 40 mg of Degussa P25 TiO<sub>2</sub>, 300 W Xe lamp λ>400 nm, 0.1 MPa of O<sub>2</sub>, 3 h, [b] Determined by GC using chlorobenzene as the internal standard. [c] 0.1 mmol of benzylamine was added. BTF, Benzotrifluoride; EtOAc, ethyl acetate; DCM, dichloromethane.

**Table S4:** The selective aerobic oxidation of thioanisole and benzylamine on TiO<sub>2</sub> in protic solvents under visible light irradiation<sup>[a]</sup>

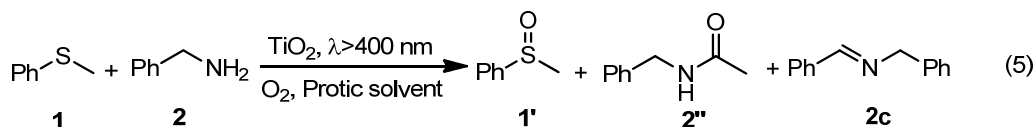

| Entry                    | Solvent                          | Thioanisole                     |                                   | Benzylamine                     |                                   |
|--------------------------|----------------------------------|---------------------------------|-----------------------------------|---------------------------------|-----------------------------------|
|                          |                                  | Conv1.<br>(mol%) <sup>[b]</sup> | Select1.<br>(mol%) <sup>[b]</sup> | Conv2.<br>(mol%) <sup>[c]</sup> | Select2.<br>(mol%) <sup>[c]</sup> |
| <b>1</b>                 | IPA                              | 2                               | 100                               | --                              | --                                |
| <b>1'</b> <sup>[d]</sup> | IPA                              | 28                              | 85                                | 100                             | <b>2c</b> (64) <sup>[e]</sup>     |
| <b>2</b>                 | C <sub>2</sub> H <sub>5</sub> OH | 1                               | 100                               | --                              | --                                |
| <b>2'</b> <sup>[d]</sup> | C <sub>2</sub> H <sub>5</sub> OH | 45                              | 88                                | 100                             | <b>2c</b> (35) <sup>[e]</sup>     |
| <b>3</b>                 | CH <sub>3</sub> OH               | 6                               | 93                                | --                              | --                                |
| <b>3'</b> <sup>[d]</sup> | CH <sub>3</sub> OH               | 77                              | 93                                | 100                             | <b>2''</b> (79) <sup>[e]</sup>    |

[a] Reaction conditions: 0.3 mmol of **2**, 0.1 MPa of O<sub>2</sub>, 40 mg Degussa P25 TiO<sub>2</sub>, 300 W Xe lamp, 5 mL of solvent, λ>400 nm, 3 h. [b] Determined by GC using chlorobenzene as the internal standard, conversion of **2**, selectivity of **2b**. [c] Determined by GC using chlorobenzene as the internal standard, conversion of benzylamine. [d] 0.1 mmol of **1** was added. [e] Data in the parentheses is the selectivity for the indicated product for the oxidation of **1**, IPA, isopropanol.

**Table S5:** The scale-up for the synergistic photocatalytic oxidation of sulfide to amines <sup>[a]</sup>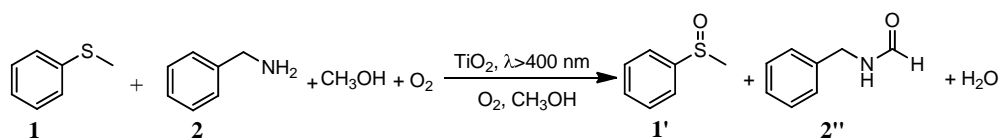

| Entry            | Substrates (mmol) | Time (h) | Conv1. (mol%) <sup>[b]</sup> | Select1. (mol%) <sup>[b]</sup> | Conv2. (mol%) <sup>[c]</sup> | Select2. (mol%) <sup>[c]</sup> |
|------------------|-------------------|----------|------------------------------|--------------------------------|------------------------------|--------------------------------|
| 1                | 0.05+ 0.15        | 2        | 85                           | 92                             | 100                          | 77                             |
| 2                | 0.1+ 0.3          | 4        | 83                           | 92                             | 100                          | 78                             |
| 3                | 0.2+ 0.6          | 8        | 88                           | 89                             | 100                          | 82                             |
| 4 <sup>[d]</sup> | 0.3+ 0.9          | 12       | 83                           | 91                             | 100                          | 42                             |

[a] Reaction conditions: 5 mL of CH<sub>3</sub>OH, 40 mg of TiO<sub>2</sub>, 300 W Xe lamp, λ>400 nm, 0.1 MPa of O<sub>2</sub>, [b] Determined by GC using chlorobenzene as the internal standard, conversion of thioanisole **1**, selectivity of sulfoxide **1'**; [c] Determined by GC using chlorobenzene as the internal standard, conversion of benzylamine **2**, selectivity of *N*-benzylformamide **2''**. [d] 15% of benzaldehyde **2y** and 5% of imine **2z** were the other products detected.

**Table S6:** Control experiment for the synergistic photocatalytic oxidation of thioanisole on Degussa P25 TiO<sub>2</sub> in organic solvent<sup>[a]</sup>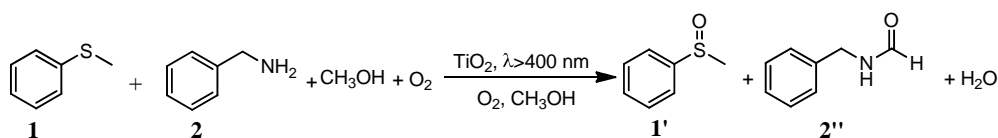

| Entry            | Conditions | Conv1. (mol%) <sup>[b]</sup> | Select1. (mol%) <sup>[b]</sup> | Conv2. (mol%) <sup>[c]</sup> | Select2. (mol%) <sup>[c]</sup> |
|------------------|------------|------------------------------|--------------------------------|------------------------------|--------------------------------|
| 1                | >350 nm    | 30                           | 92                             | 100                          | 10                             |
| 2                | >400 nm    | 83                           | 92                             | 100                          | 78                             |
| 3 <sup>[d]</sup> | >400 nm    | 0                            | --                             | 0                            | --                             |
| 4 <sup>[e]</sup> | >400 nm    | 0                            | --                             | 0                            | --                             |
| 4 <sup>[f]</sup> | --         | 0                            | --                             | 0                            | --                             |
| 5                | >420 nm    | 0                            | --                             | 15                           | 0                              |

[a] Reaction conditions: 5 mL of methanol, 40 mg of Degussa P25 TiO<sub>2</sub>, 300 W Xe lamp λ>400 nm, 0.1 MPa of O<sub>2</sub>, 4 h. [b] Determined by GC using chlorobenzene as the internal standard, conversion of thioanisole, selectivity of sulfoxide; [c] Determined by GC using chlorobenzene as the internal standard, conversion of benzylamine, selectivity of *N*-benzylformamide. [d] Without O<sub>2</sub> with 0.1 MPa of N<sub>2</sub> as the atmosphere. [e] Without TiO<sub>2</sub>. [f] Without λ>400 nm visible light irradiation.

**Table S7:** Adsorption difference of benzylamine on Degussa P25 TiO<sub>2</sub> in CH<sub>3</sub>OH and CH<sub>3</sub>CN

| Entry | Solvent            | Adsorption amounts |
|-------|--------------------|--------------------|
| 1     | CH <sub>3</sub> OH | 3 μmol             |
| 2     | CH <sub>3</sub> CN | 10 μmol            |

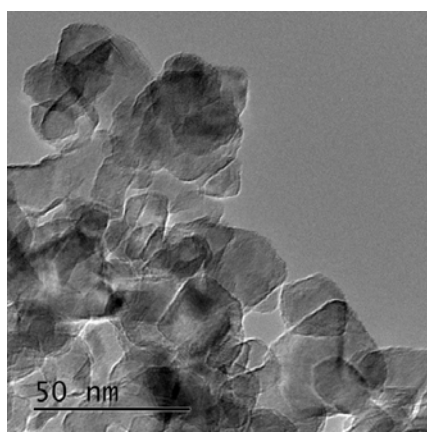

**Figure S1:** Transmission electron microscopy (TEM) images of Degussa P25 TiO<sub>2</sub>

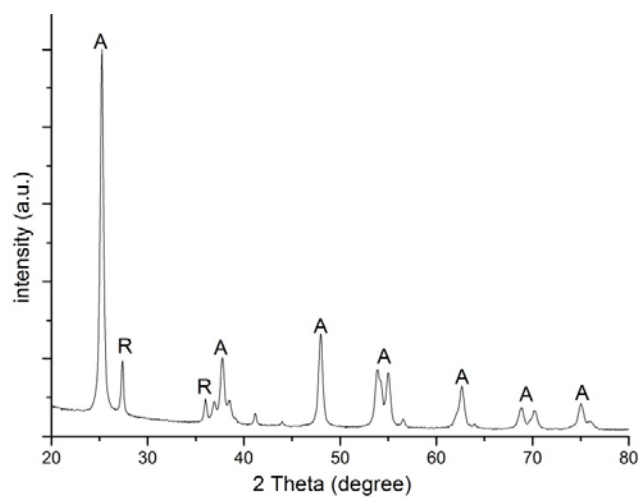

**Figure S2:** X-ray diffraction spectroscopy (XRD) of Degussa P25 TiO<sub>2</sub>

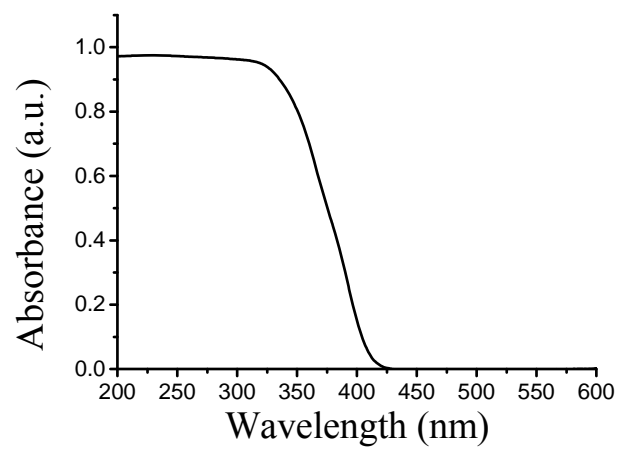

**Figure S3:** UV-visible absorbance spectroscopy of Degussa P25 TiO<sub>2</sub>

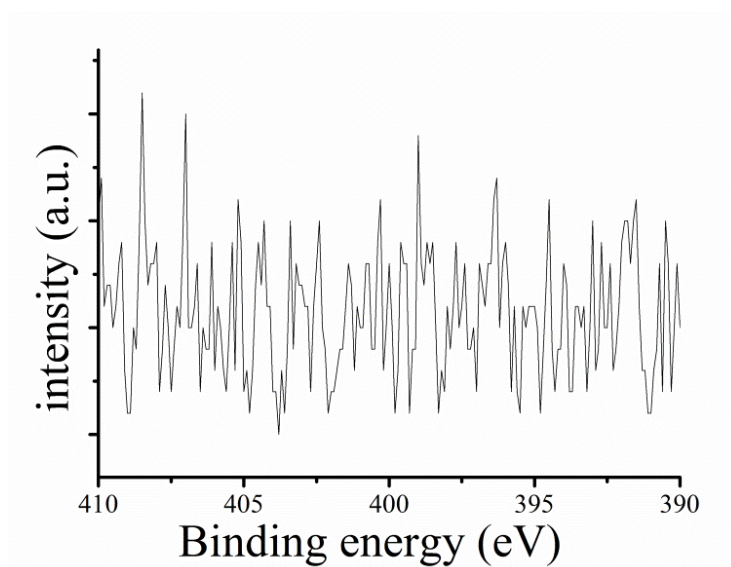

**Figure S4:** XPS spectroscopy of Degussa P25 TiO<sub>2</sub>

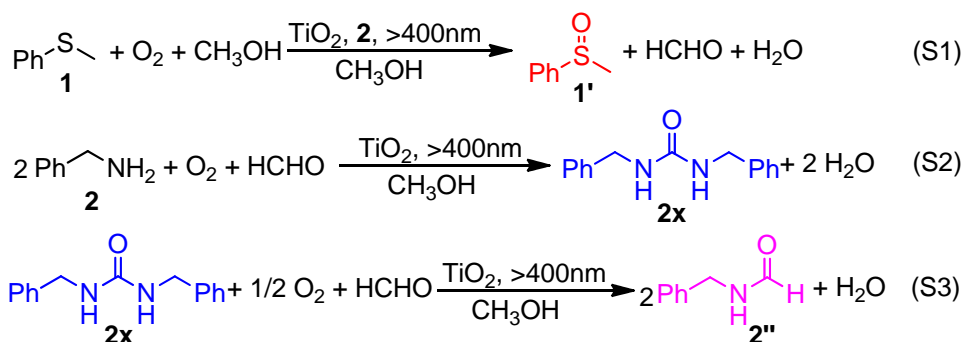

**Figure S5:** Products formation processes for the synergetic photocatalytic aerobic oxidation of sulfides and amines on TiO<sub>2</sub> under visible light irradiation

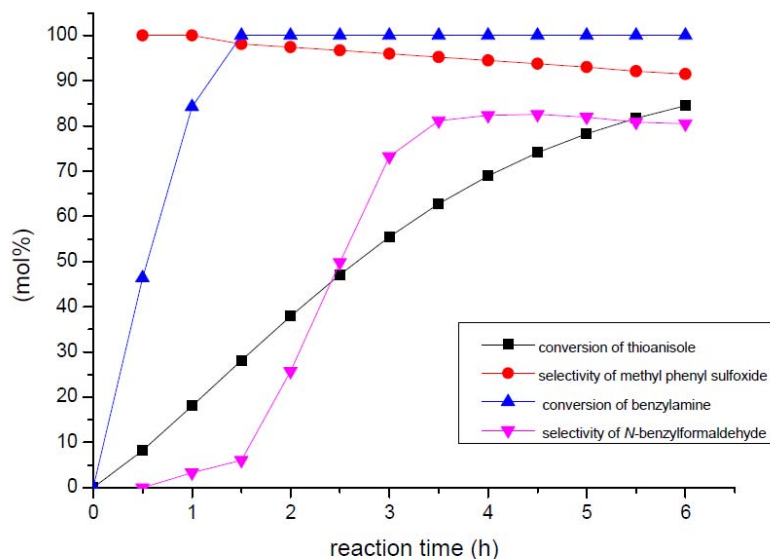

**Figure S6:** Reaction kinetic plot for the synergetic photocatalytic aerobic oxidation of sulfides and amines on TiO<sub>2</sub> under visible light irradiation. Reaction conditions: 0.3 mmol of thioanisole, 0.1 mmol of benzylamine, 40 mg of Degussa P25 TiO<sub>2</sub>, 300 W Xe lamp, 5 mL of CH<sub>3</sub>OH, λ>400 nm, 0.1 MPa of air



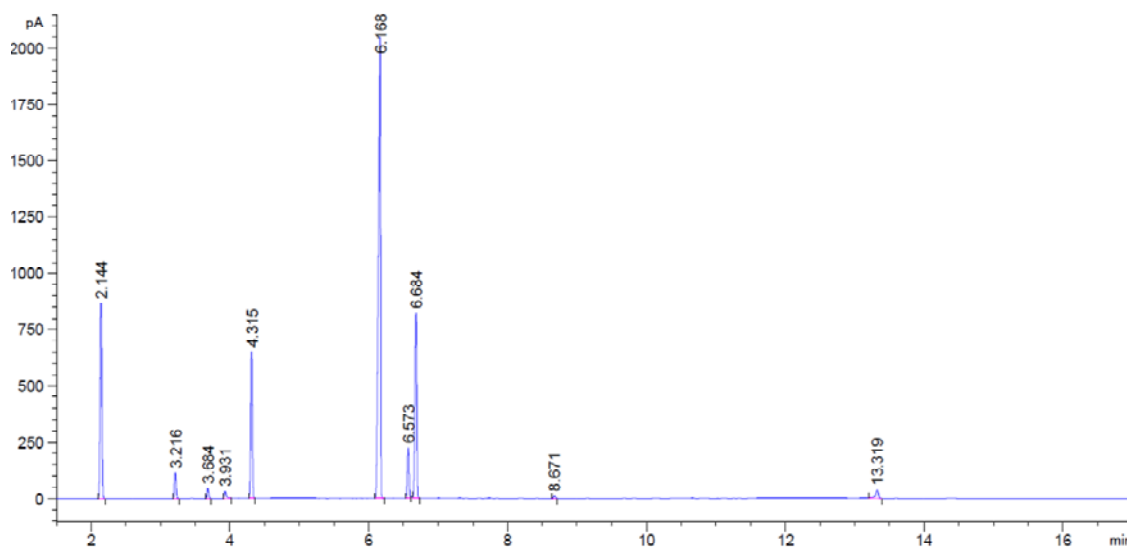

The GC-FID of Table 2 entry 1:

| Retention time (min) | 2.144                     | 3.216                      | 4.315                    | 6.168                        | 6.573                            | 6.684                       | 8.669                                |
|----------------------|---------------------------|----------------------------|--------------------------|------------------------------|----------------------------------|-----------------------------|--------------------------------------|
| Chemical             | <chem>c1ccc(Cl)cc1</chem> | <chem>c1ccc(C=O)cc1</chem> | <chem>c1ccc(S)cc1</chem> | <chem>COS(=O)c1ccccc1</chem> | <chem>COS(=O)(OC)c1ccccc1</chem> | <chem>c1ccc(CN=O)cc1</chem> | <chem>c1ccc(cc1)/N=C/c2ccccc2</chem> |

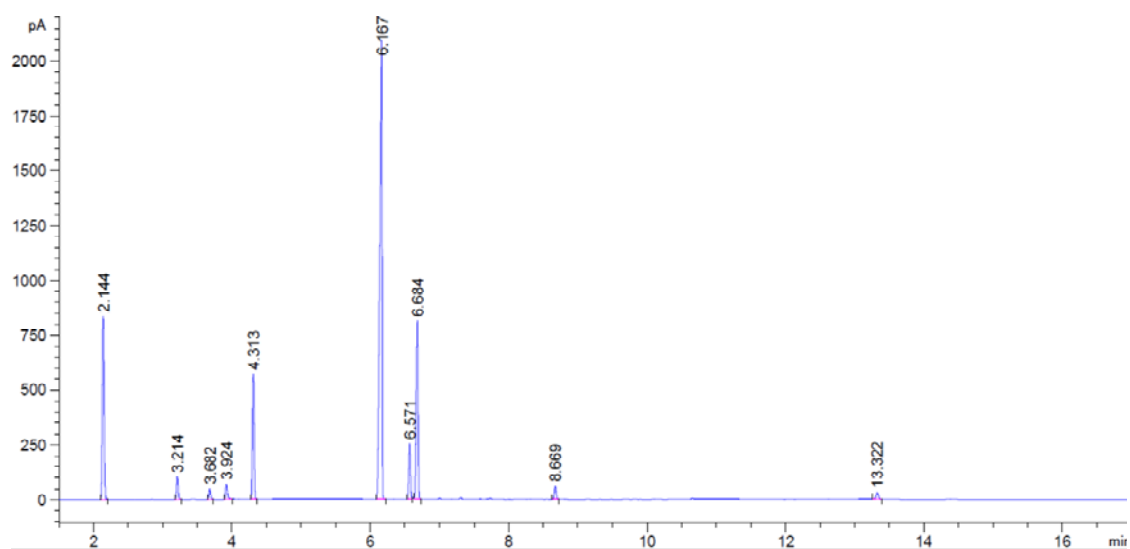

The GC-FID of Table 2 entry 2:

| Retention time (min) | 2.144                     | 3.216                      | 4.315                    | 6.168                        | 6.573                            | 6.684                       | 8.669                                |
|----------------------|---------------------------|----------------------------|--------------------------|------------------------------|----------------------------------|-----------------------------|--------------------------------------|
| Chemical             | <chem>c1ccc(Cl)cc1</chem> | <chem>c1ccc(C=O)cc1</chem> | <chem>c1ccc(S)cc1</chem> | <chem>COS(=O)c1ccccc1</chem> | <chem>COS(=O)(OC)c1ccccc1</chem> | <chem>c1ccc(CN=O)cc1</chem> | <chem>c1ccc(cc1)/N=C/c2ccccc2</chem> |

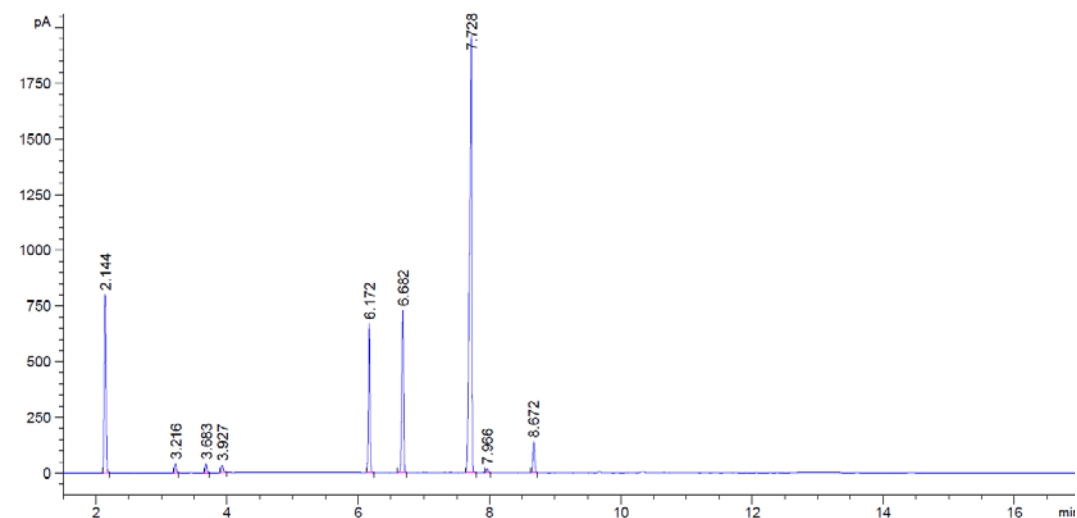

The GC-FID of Table 2 entry 3:

| Retention time (min) | 2.144                     | 3.216                      | 6.172                         | 6.684                        | 7.728                              | 7.966                              | 8.672                                |
|----------------------|---------------------------|----------------------------|-------------------------------|------------------------------|------------------------------------|------------------------------------|--------------------------------------|
| Chemical             | <chem>c1ccc(Cl)cc1</chem> | <chem>c1ccc(C=O)cc1</chem> | <chem>COC1=CC=C(S1)C=C</chem> | <chem>c1ccc(CNC=O)cc1</chem> | <chem>COC(=O)C1=CC=C(S1)C=C</chem> | <chem>COC(=O)C1=CC=C(S1)C=C</chem> | <chem>c1ccc(cc1)/N=C/c2ccccc2</chem> |

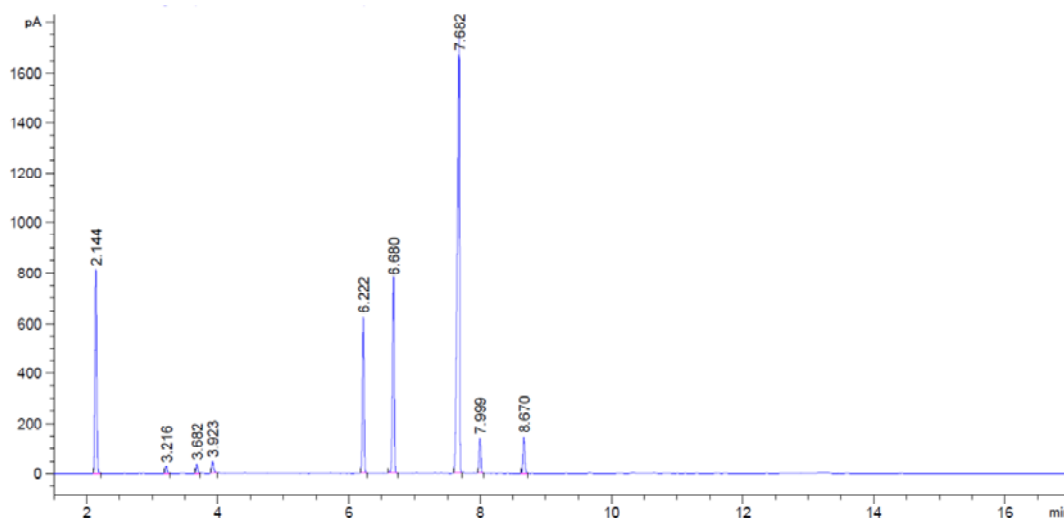

The GC-FID of Table 2 entry 4:

| Retention time (min) | 2.144                     | 3.216                      | 6.172                         | 6.680                        | 7.682                              | 7.999                              | 8.670                                |
|----------------------|---------------------------|----------------------------|-------------------------------|------------------------------|------------------------------------|------------------------------------|--------------------------------------|
| Chemical             | <chem>c1ccc(Cl)cc1</chem> | <chem>c1ccc(C=O)cc1</chem> | <chem>COC1=CC=C(S1)C=C</chem> | <chem>c1ccc(CNC=O)cc1</chem> | <chem>COC(=O)C1=CC=C(S1)C=C</chem> | <chem>COC(=O)C1=CC=C(S1)C=C</chem> | <chem>c1ccc(cc1)/N=C/c2ccccc2</chem> |

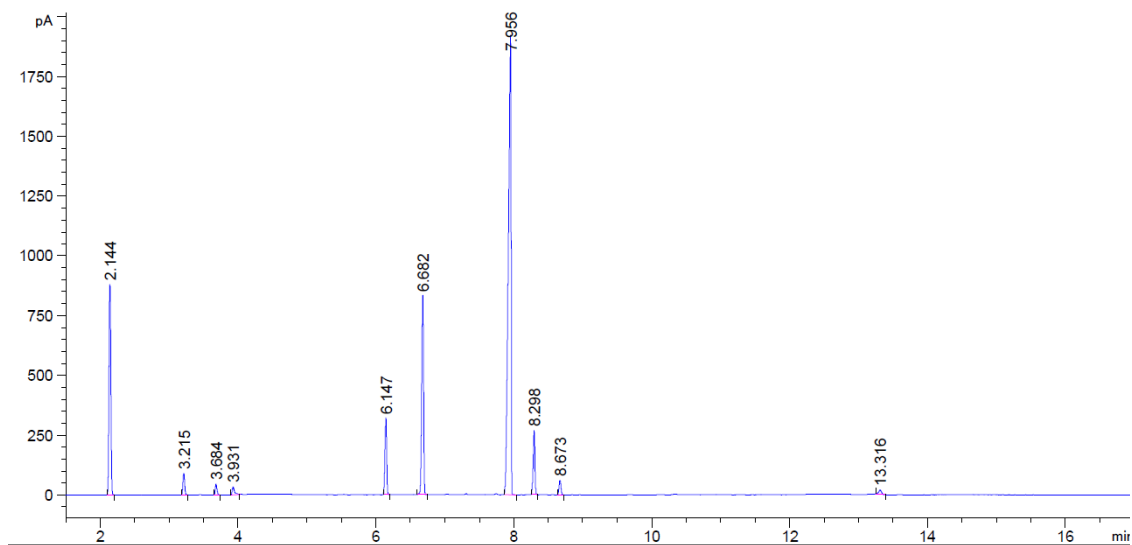

The GC-FID of Table 2 entry 5:

| Retention time (min) | 2.144                     | 3.216                    | 6.147                      | 6.682                        | 7.956                               | 8.298                               | 8.673                                 |
|----------------------|---------------------------|--------------------------|----------------------------|------------------------------|-------------------------------------|-------------------------------------|---------------------------------------|
| Chemical             | <chem>c1ccc(Cl)cc1</chem> | <chem>c1ccccc1C=O</chem> | <chem>COc1ccc(S)cc1</chem> | <chem>c1ccc(CNC=O)cc1</chem> | <chem>COc1ccc(S(=O)(=O)C)cc1</chem> | <chem>COc1ccc(S(=O)(=O)C)cc1</chem> | <chem>c1ccc(cc1)/C=N/Cc2ccccc2</chem> |

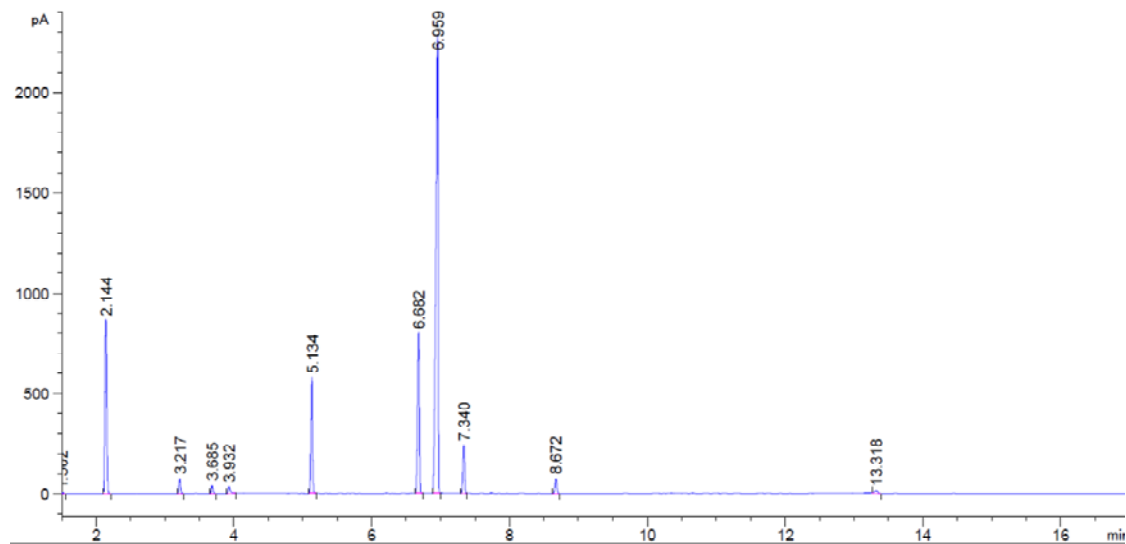

The GC-FID of Table 2 entry 5:

| Retention time (min) | 2.144                     | 3.216                    | 5.134                     | 6.682                        | 6.959                              | 7.340                              | 8.672                                 |
|----------------------|---------------------------|--------------------------|---------------------------|------------------------------|------------------------------------|------------------------------------|---------------------------------------|
| Chemical             | <chem>c1ccc(Cl)cc1</chem> | <chem>c1ccccc1C=O</chem> | <chem>Cc1ccc(S)cc1</chem> | <chem>c1ccc(CNC=O)cc1</chem> | <chem>Cc1ccc(S(=O)(=O)C)cc1</chem> | <chem>Cc1ccc(S(=O)(=O)C)cc1</chem> | <chem>c1ccc(cc1)/C=N/Cc2ccccc2</chem> |

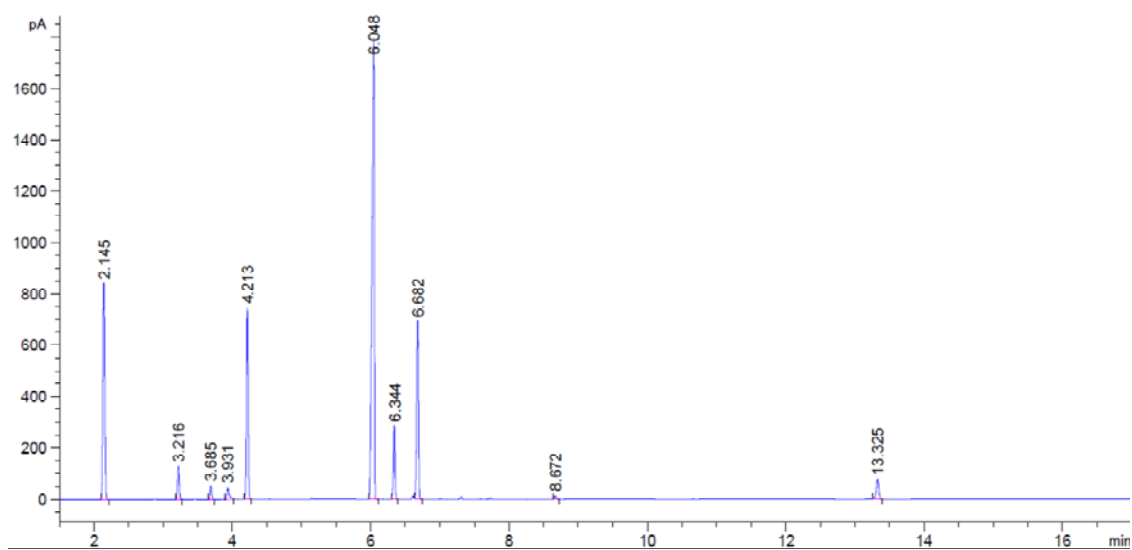

The GC-FID of Table 2 entry 6:

| Retention time (min) | 2.145                     | 3.216                    | 4.213                      | 6.048                           | 6.344                           | 6.682                      | 8.672                                 |
|----------------------|---------------------------|--------------------------|----------------------------|---------------------------------|---------------------------------|----------------------------|---------------------------------------|
| Chemical             | <chem>c1ccc(Cl)cc1</chem> | <chem>c1ccccc1C=O</chem> | <chem>CSc1ccc(F)cc1</chem> | <chem>COC(=O)c1ccc(F)cc1</chem> | <chem>COC(=O)c1ccc(F)cc1</chem> | <chem>O=CNCc1ccccc1</chem> | <chem>c1ccc(cc1)/C=N/Cc2ccccc2</chem> |

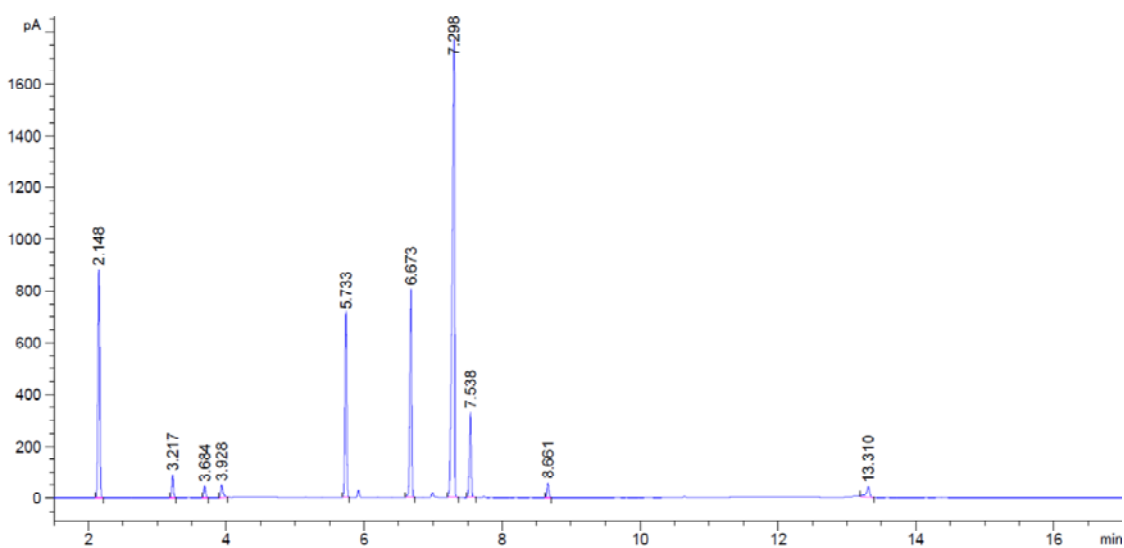

The GC-FID of Table 2 entry 7:

| Retention time (min) | 2.148                     | 3.217                    | 5.733                       | 6.673                      | 7.298                            | 7.538                           | 8.661                                 |
|----------------------|---------------------------|--------------------------|-----------------------------|----------------------------|----------------------------------|---------------------------------|---------------------------------------|
| Chemical             | <chem>c1ccc(Cl)cc1</chem> | <chem>c1ccccc1C=O</chem> | <chem>CSc1ccc(Cl)cc1</chem> | <chem>O=CNCc1ccccc1</chem> | <chem>COC(=O)c1ccc(Cl)cc1</chem> | <chem>COC(=O)c1ccc(F)cc1</chem> | <chem>c1ccc(cc1)/C=N/Cc2ccccc2</chem> |

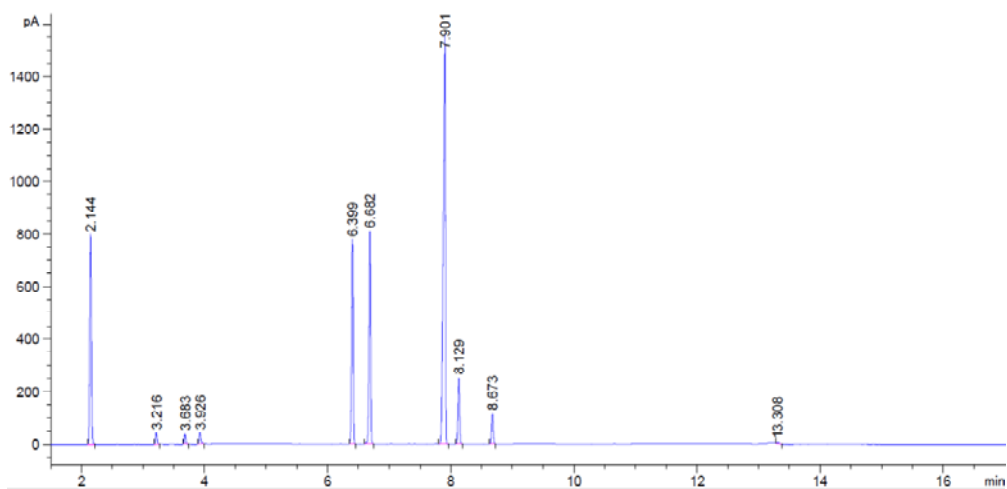

The GC-FID of Table 2 entry 8:

| Retention time (min) | 2.148                     | 3.216                    | 6.399                       | 6.682                      | 7.901                       | 7.538                                      | 8.661                                |
|----------------------|---------------------------|--------------------------|-----------------------------|----------------------------|-----------------------------|--------------------------------------------|--------------------------------------|
| Chemical             | <chem>c1ccc(Cl)cc1</chem> | <chem>c1ccccc1C=O</chem> | <chem>CSc1ccc(Br)cc1</chem> | <chem>CNC=Oc1ccccc1</chem> | <chem>CSc1ccc(Br)cc1</chem> | <chem>CSc1ccc(S(=O)(=O)c2ccccc2)cc1</chem> | <chem>c1ccc(cc1)/N=C/c2ccccc2</chem> |

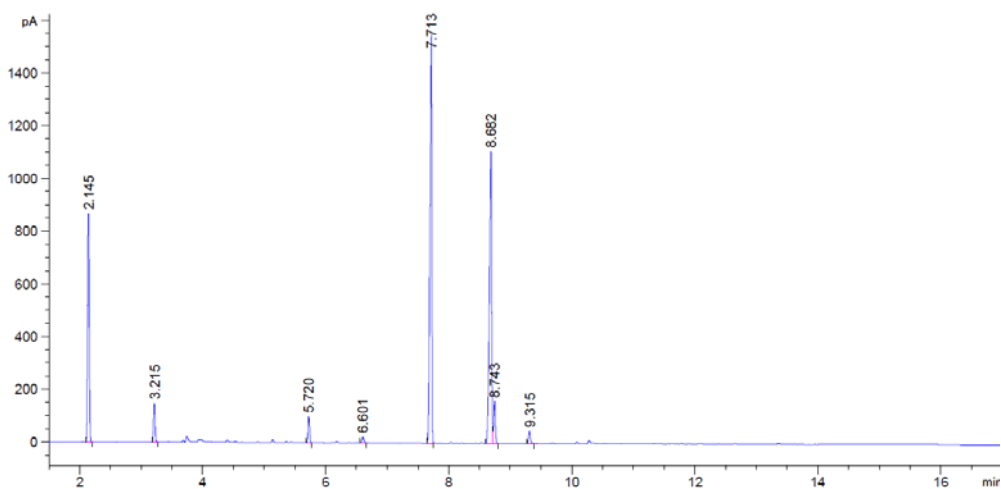

The GC-FID of Table 2 entry 9:

| Retention time (min) | 2.148                     | 3.216                    | 7.713                                 | 8.682                                 | 8.743                                      |
|----------------------|---------------------------|--------------------------|---------------------------------------|---------------------------------------|--------------------------------------------|
| Chemical             | <chem>c1ccc(Cl)cc1</chem> | <chem>c1ccccc1C=O</chem> | <chem>CSc1ccc([N+](=O)[O-])cc1</chem> | <chem>CSc1ccc([N+](=O)[O-])cc1</chem> | <chem>CSc1ccc(S(=O)(=O)c2ccccc2)cc1</chem> |

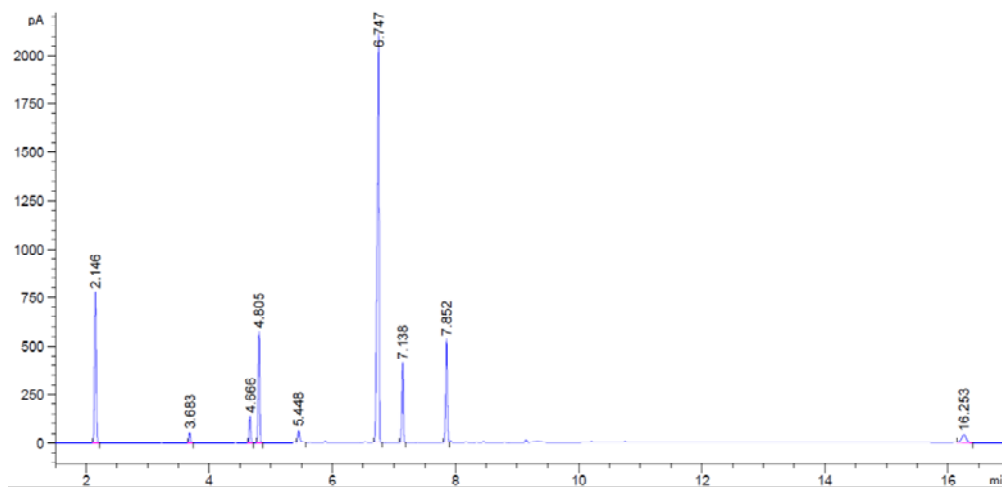

The GC-FID of Table 2 entry 10:

| Retention time (min) | 2.148                     | 3.216                        | 4.805                    | 6.747                        | 7.138                                 | 7.852                          |
|----------------------|---------------------------|------------------------------|--------------------------|------------------------------|---------------------------------------|--------------------------------|
| Chemical             | <chem>c1ccc(Cl)cc1</chem> | <chem>O=Cc1ccc(Cl)cc1</chem> | <chem>CCSc1ccccc1</chem> | <chem>CC(=O)Sc1ccccc1</chem> | <chem>CC(=O)OS(=O)(=O)c1ccccc1</chem> | <chem>O=CNCc1ccc(Cl)cc1</chem> |

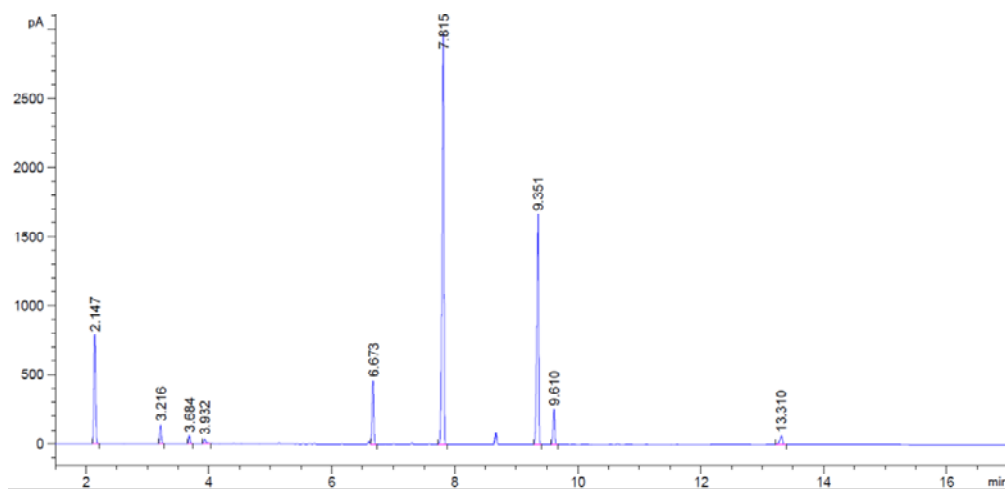

The GC-FID of Table 2 entry 11:

| Retention time (min) | 2.148                     | 3.216                    | 6.673                      | 7.615                            | 9.351                                        | 9.610                                        |
|----------------------|---------------------------|--------------------------|----------------------------|----------------------------------|----------------------------------------------|----------------------------------------------|
| Chemical             | <chem>c1ccc(Cl)cc1</chem> | <chem>O=Cc1ccccc1</chem> | <chem>O=CNCc1ccccc1</chem> | <chem>c1ccc(cc1)Sc2ccccc2</chem> | <chem>O=C(Oc1ccccc1)S(=O)(=O)c2ccccc2</chem> | <chem>O=C(Oc1ccccc1)S(=O)(=O)c2ccccc2</chem> |

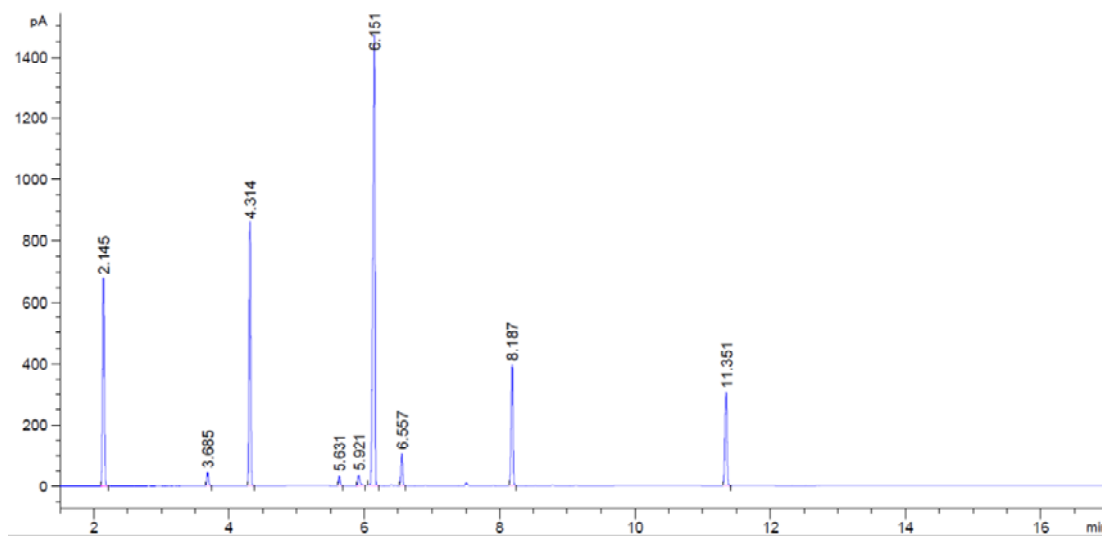

The GC-FID of Table 3 entry 1:

| Retention time (min) | 2.145                     | 4.314                    | 5.563                        | 6.151                        | 6.557                        | 8.187                          | 11.351                                   |
|----------------------|---------------------------|--------------------------|------------------------------|------------------------------|------------------------------|--------------------------------|------------------------------------------|
| Chemical             | <chem>c1ccc(Cl)cc1</chem> | <chem>c1ccc(S)cc1</chem> | <chem>COc1ccc(C=O)cc1</chem> | <chem>COC(=O)c1ccccc1</chem> | <chem>COC(=O)c1ccccc1</chem> | <chem>COc1ccc(CNC=O)cc1</chem> | <chem>COc1ccc(C=Nc2ccc(OC)cc2)cc1</chem> |

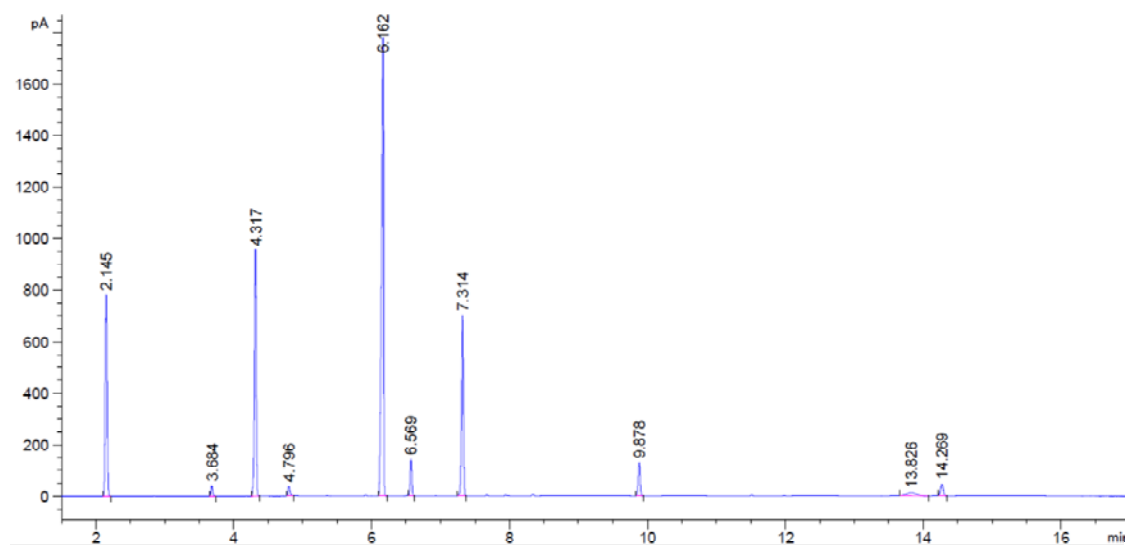

The GC-FID of Table 3 entry 2:

| Retention time (min) | 2.145                     | 4.796                       | 4.317                     | 6.162                        | 6.569                        | 7.314                         | 9.878                                  |
|----------------------|---------------------------|-----------------------------|---------------------------|------------------------------|------------------------------|-------------------------------|----------------------------------------|
| Chemical             | <chem>c1ccc(Cl)cc1</chem> | <chem>Cc1ccc(C=O)cc1</chem> | <chem>Cc1ccc(S)cc1</chem> | <chem>COC(=O)c1ccccc1</chem> | <chem>COC(=O)c1ccccc1</chem> | <chem>Cc1ccc(CNC=O)cc1</chem> | <chem>Cc1ccc(C=Nc2ccc(C)cc2)cc1</chem> |

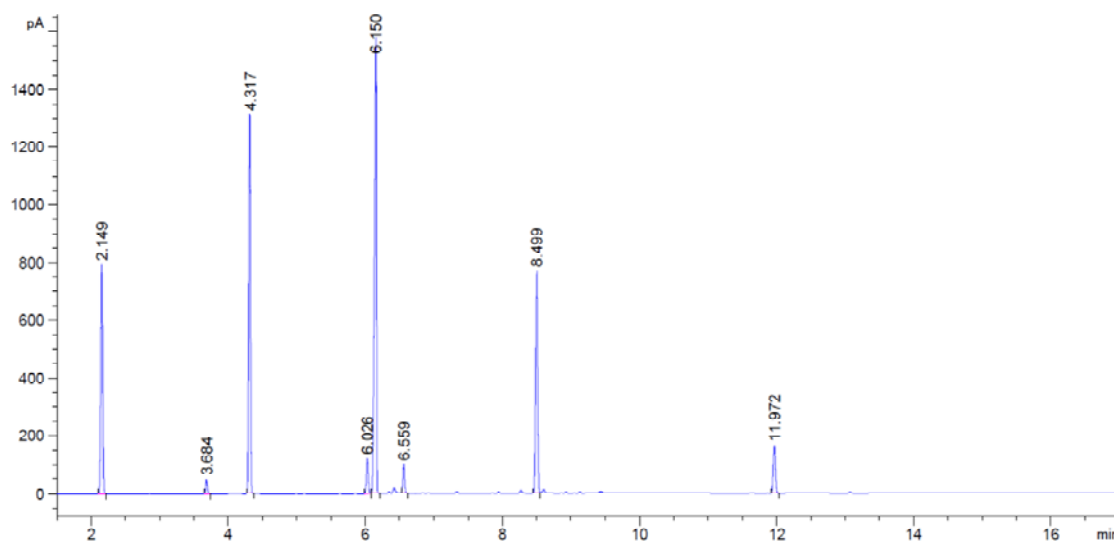

The GC-FID of Table 3 entry 3:

| Retention time (min) | 2.149                     | 4.317                   | 6.026                    | 6.150                       | 6.559                        | 8.499                     | 11.972                                  |
|----------------------|---------------------------|-------------------------|--------------------------|-----------------------------|------------------------------|---------------------------|-----------------------------------------|
| Chemical             | <chem>c1ccc(Cl)cc1</chem> | <chem>CSc1ccccc1</chem> | <chem>CC(C)(C)C=O</chem> | <chem>CC(=O)c1ccccc1</chem> | <chem>CC(=O)Sc1ccccc1</chem> | <chem>CC(C)(C)CN=O</chem> | <chem>CC(C)(C)C=NC(C)C=CC(C)(C)C</chem> |

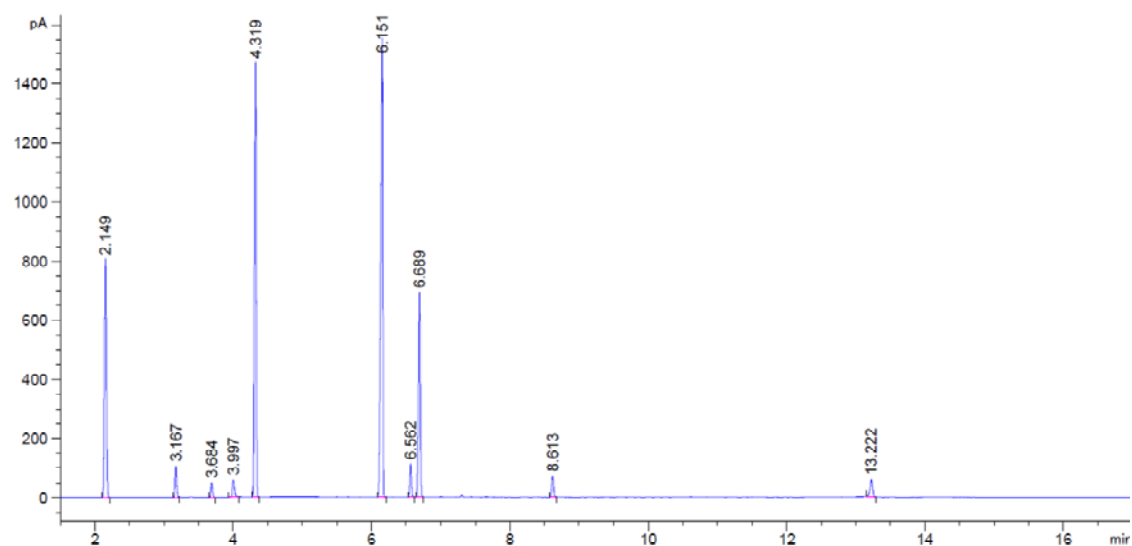

The GC-FID of Table 3 entry 4:

| Retention time (min) | 2.149                     | 3.167                       | 4.319                   | 6.151                       | 6.562                        | 6.689                 | 8.613                                   |
|----------------------|---------------------------|-----------------------------|-------------------------|-----------------------------|------------------------------|-----------------------|-----------------------------------------|
| Chemical             | <chem>c1ccc(Cl)cc1</chem> | <chem>C=Oc1ccc(F)cc1</chem> | <chem>CSc1ccccc1</chem> | <chem>CC(=O)c1ccccc1</chem> | <chem>CC(=O)Sc1ccccc1</chem> | <chem>CC(C)N=O</chem> | <chem>Fc1ccc(C=NC(C)C=CC(F)C)cc1</chem> |



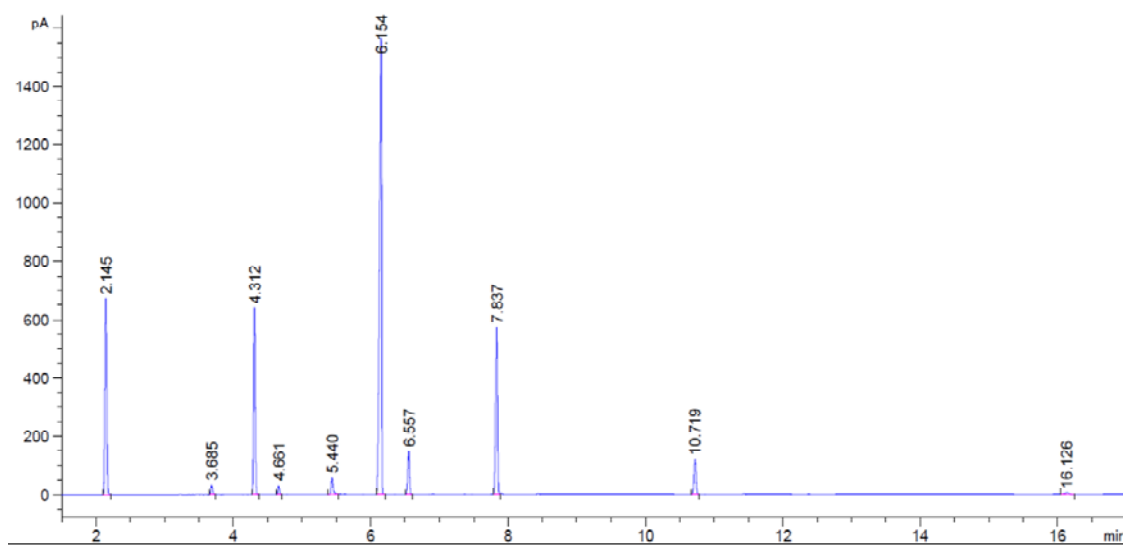

The GC-FID of Table 3 entry 5:

| Retention time (min) | 2.149                     | 4.312                    | 4.661                        | 6.154                        | 6.557                            | 7.837                         | 10.719                            |
|----------------------|---------------------------|--------------------------|------------------------------|------------------------------|----------------------------------|-------------------------------|-----------------------------------|
| Chemical             | <chem>c1ccc(Cl)cc1</chem> | <chem>c1ccc(S)cc1</chem> | <chem>O=Cc1ccc(Cl)cc1</chem> | <chem>COS(=O)c1ccccc1</chem> | <chem>COS(=O)(=O)c1ccccc1</chem> | <chem>O=CNc1ccc(Cl)cc1</chem> | <chem>O=C/N=C/c1ccc(Cl)cc1</chem> |

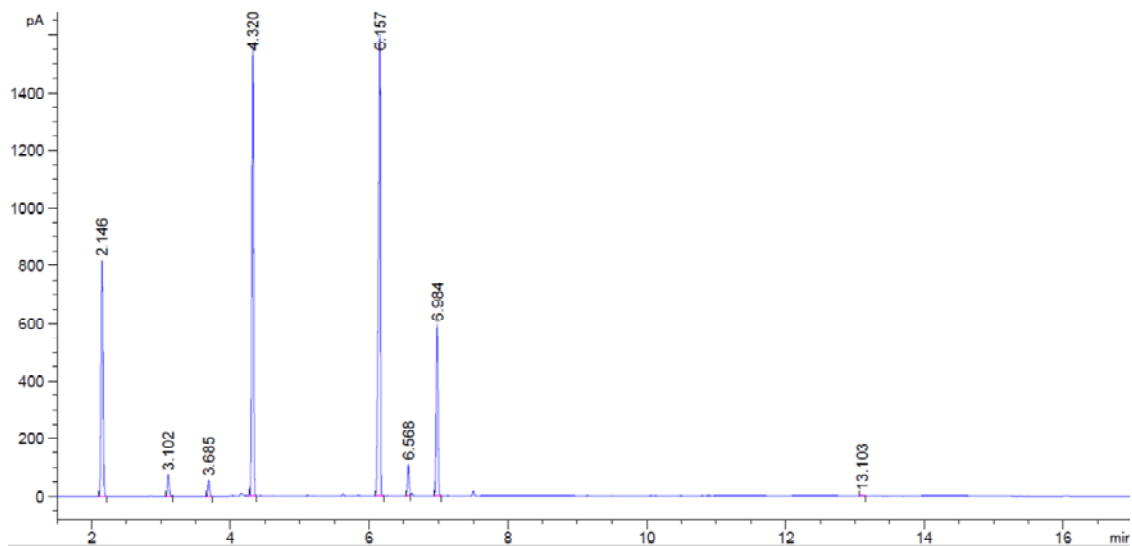

The GC-FID of Table 3 entry 6:

| Retention time (min) | 2.149                     | 3.102                    | 4.320                    | 6.157                        | 6.568                            | 6.984                     |
|----------------------|---------------------------|--------------------------|--------------------------|------------------------------|----------------------------------|---------------------------|
| Chemical             | <chem>c1ccc(Cl)cc1</chem> | <chem>O=Cc1ccccn1</chem> | <chem>c1ccc(S)cc1</chem> | <chem>COS(=O)c1ccccc1</chem> | <chem>COS(=O)(=O)c1ccccc1</chem> | <chem>O=CNc1ccccn1</chem> |

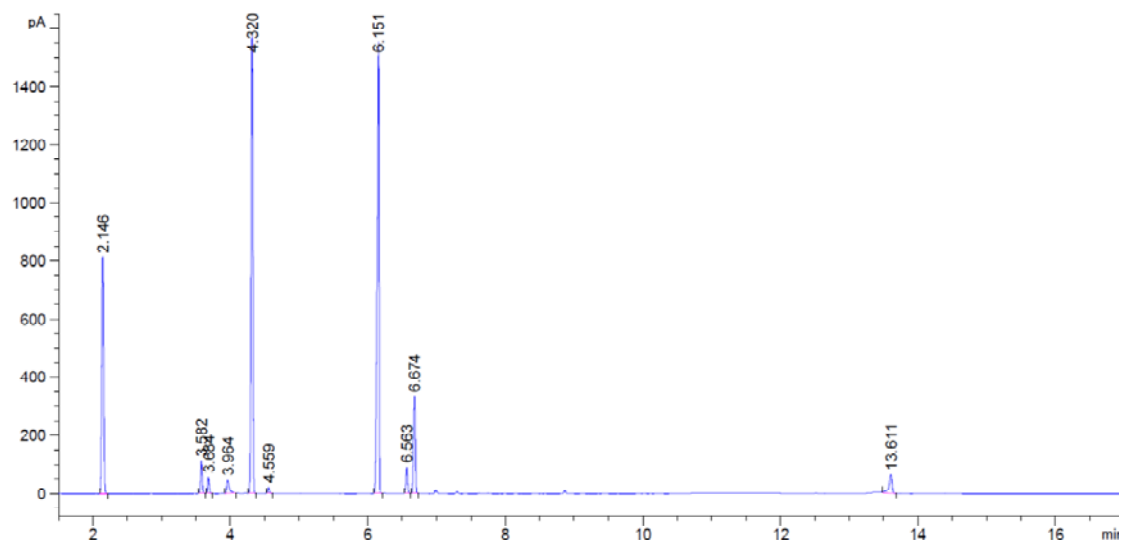

The GC-FID of Table 3 entry 7:

| Retention time (min) | 2.149                     | 3.582                     | 4.320                      | 6.151                               | 6.563                               | 6.674                          |
|----------------------|---------------------------|---------------------------|----------------------------|-------------------------------------|-------------------------------------|--------------------------------|
| Chemical             | <chem>c1ccc(Cl)cc1</chem> | <chem>C=CC1=CC=CS1</chem> | <chem>CSC1=CC=CC=C1</chem> | <chem>COP(=O)(OC)C1=CC=CC=C1</chem> | <chem>COP(=O)(OC)C1=CC=CC=C1</chem> | <chem>C=CC1=CC=CS1.NC=O</chem> |

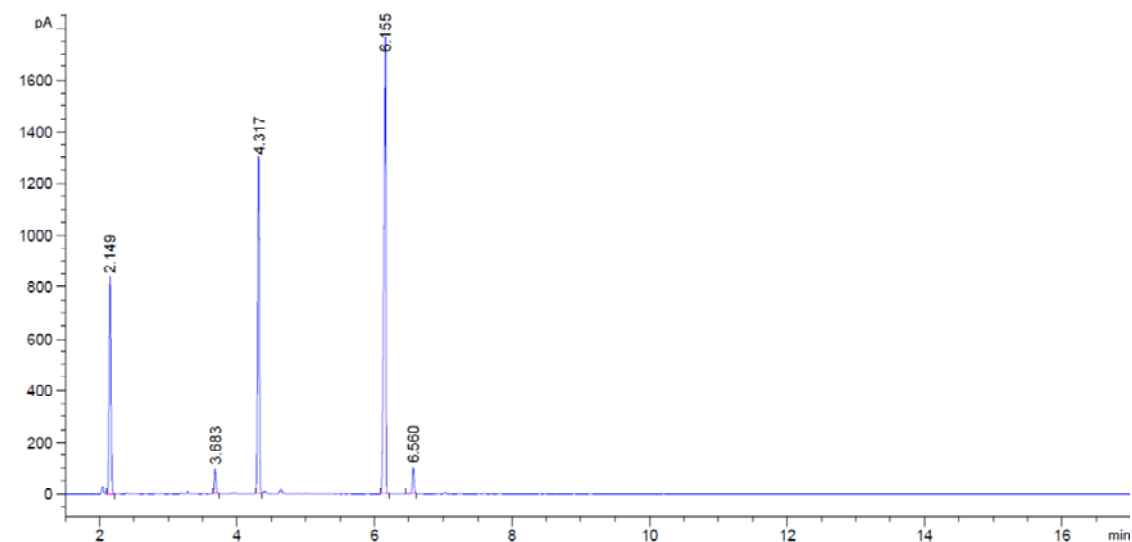

The GC-FID of Table 3 entry 8:

| Retention time (min) | 2.149                     | 3.683                          | 4.317                      | 6.155                               | 6.560                               |
|----------------------|---------------------------|--------------------------------|----------------------------|-------------------------------------|-------------------------------------|
| Chemical             | <chem>c1ccc(Cl)cc1</chem> | <chem>C=CC1=CC=CO1.NC=O</chem> | <chem>CSC1=CC=CC=C1</chem> | <chem>COP(=O)(OC)C1=CC=CC=C1</chem> | <chem>COP(=O)(OC)C1=CC=CC=C1</chem> |

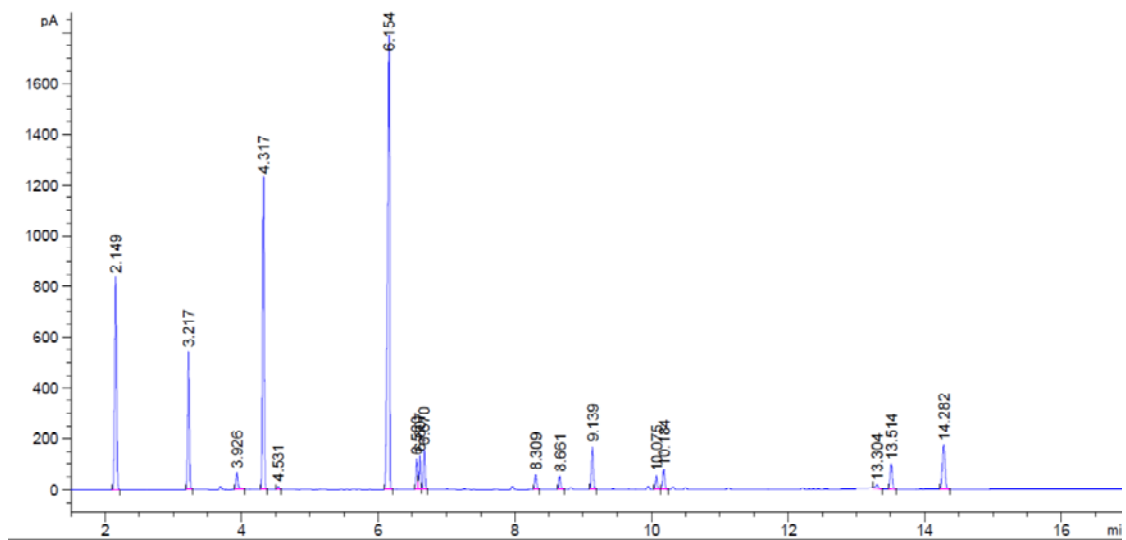

The GC-FID of Table 3 entry 9:

| Retention time (min) | 2.145                     | 3.217                      | 4.317                    | 6.154                          | 6.560                              | 8.661                                |
|----------------------|---------------------------|----------------------------|--------------------------|--------------------------------|------------------------------------|--------------------------------------|
| Chemical             | <chem>c1ccc(Cl)cc1</chem> | <chem>c1ccc(C=O)cc1</chem> | <chem>c1ccc(S)cc1</chem> | <chem>c1ccc(C(=O)OC)cc1</chem> | <chem>c1ccc(S(=O)(=O)OC)cc1</chem> | <chem>c1ccc(cc1)/N=C/c2ccccc2</chem> |

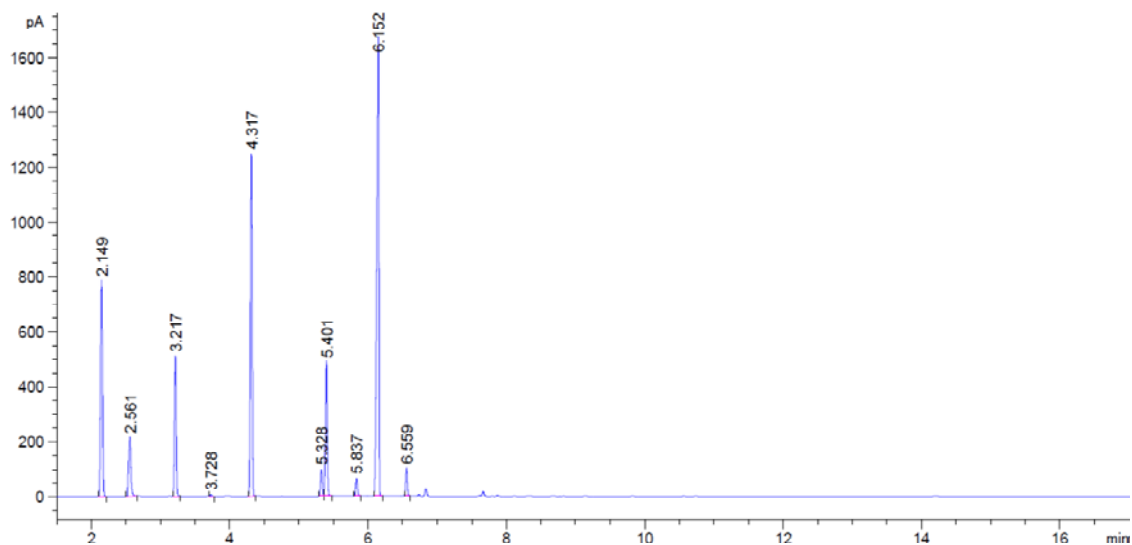

The GC-FID of Table 3 entry 10:

| Retention time (min) | 2.145                     | 3.217                      | 4.317                    | 5.401                       | 6.152                          | 6.559                              | 8.661                                |
|----------------------|---------------------------|----------------------------|--------------------------|-----------------------------|--------------------------------|------------------------------------|--------------------------------------|
| Chemical             | <chem>c1ccc(Cl)cc1</chem> | <chem>c1ccc(C=O)cc1</chem> | <chem>c1ccc(S)cc1</chem> | <chem>CC(C)Nc1ccccc1</chem> | <chem>c1ccc(C(=O)OC)cc1</chem> | <chem>c1ccc(S(=O)(=O)OC)cc1</chem> | <chem>c1ccc(cc1)/N=C/c2ccccc2</chem> |
